# Supplementary material
Source: PubMed Central journal article supplement (PMC3276709)
Supplement: NIHMS327725-supplement-supplement_1.pdf [file NIHMS327725-supplement-supplement_1.pdf]

Supplementary Table 1. Trends in prevalence of overweight, general obesity and abdominal obesity among Chinese Adults: the CHNS 1993-2009 (using WGOc criteria for Chinese)

|             | 1993     |            | 1997     |            | 2000     |            | 2004     |            | 2006     |            | 2009     |            | <i>p</i> for trend <sup>a</sup> | $\Delta$ <sup>b</sup> |
|-------------|----------|------------|----------|------------|----------|------------|----------|------------|----------|------------|----------|------------|---------------------------------|-----------------------|
|             | <i>n</i> | % (SE)     |                                 |                       |
| Overweight  |          |            |          |            |          |            |          |            |          |            |          |            |                                 |                       |
| Total       | 7760     | 17.4 (0.4) | 8354     | 20.3 (0.4) | 9333     | 24.1 (0.4) | 8983     | 25.7 (0.5) | 8826     | 26.5 (0.5) | 9365     | 27.5 (0.5) | <0.001                          | 10.1                  |
| Men         |          |            |          |            |          |            |          |            |          |            |          |            |                                 |                       |
| Overall     | 3678     | 14.9 (0.6) | 4048     | 18.5 (0.6) | 4443     | 23.4 (0.6) | 4263     | 26.2 (0.7) | 4147     | 27.9 (0.7) | 4420     | 30.0 (0.7) | <0.001                          | 15.1                  |
| Age (years) |          |            |          |            |          |            |          |            |          |            |          |            |                                 |                       |
| 18-39       | 1823     | 11.8 (0.8) | 1839     | 15.8 (0.8) | 1844     | 20.7 (0.9) | 1391     | 23.1 (1.1) | 1197     | 25.0 (1.3) | 1177     | 26.9 (1.3) | <0.001                          | 15.1                  |
| 40-59       | 1269     | 19.2 (1.1) | 1506     | 22.6 (1.1) | 1776     | 28.0 (1.1) | 1911     | 31.4 (1.1) | 1931     | 33.5 (1.1) | 2049     | 35.1 (1.1) | <0.001                          | 15.9                  |
| ≥60         | 586      | 17.1 (1.6) | 703      | 19.9 (1.5) | 823      | 23.7 (1.5) | 961      | 26.9 (1.4) | 1019     | 26.8 (1.4) | 1194     | 30.3 (1.3) | <0.001                          | 13.2                  |
| Region      |          |            |          |            |          |            |          |            |          |            |          |            |                                 |                       |
| Urban       | 1152     | 19.7 (1.2) | 1421     | 21.8 (1.1) | 1506     | 25.4 (1.1) | 1489     | 29.1 (1.2) | 1408     | 29.1 (1.2) | 1450     | 31.0 (1.2) | <0.001                          | 11.3                  |
| Rural       | 2526     | 12.5 (0.7) | 2627     | 16.5 (0.7) | 2937     | 22.2 (0.8) | 2774     | 24.5 (0.8) | 2739     | 27.1 (0.8) | 2970     | 29.4 (0.8) | <0.001                          | 16.9                  |
| Women       |          |            |          |            |          |            |          |            |          |            |          |            |                                 |                       |
| Overall     | 4082     | 19.8 (0.6) | 4306     | 22.1 (0.6) | 4890     | 24.8 (0.6) | 4720     | 25.1 (0.6) | 4679     | 25.3 (0.6) | 4945     | 25.3 (0.6) | <0.001                          | 5.5                   |
| Age (years) |          |            |          |            |          |            |          |            |          |            |          |            |                                 |                       |
| 18-39       | 2063     | 15.0 (0.8) | 1881     | 18.2 (0.9) | 1973     | 19.4 (0.9) | 1501     | 19.8 (1.0) | 1324     | 19.8 (1.1) | 1289     | 19.9 (1.1) | <0.001                          | 4.9                   |

|  |                 |      |            |      |            |      |            |      |            |      |            |      |            |        |      |
|--|-----------------|------|------------|------|------------|------|------------|------|------------|------|------------|------|------------|--------|------|
|  | 40-59           | 1390 | 26.4 (1.2) | 1634 | 28.8 (1.1) | 1967 | 33.7 (1.1) | 2147 | 34.0 (1.0) | 2179 | 33.6 (1.0) | 2311 | 32.8 (1.0) | <0.001 | 6.4  |
|  | ≥60             | 629  | 23.5 (1.7) | 791  | 22.4 (1.5) | 950  | 26.0 (1.4) | 1072 | 26.3 (1.3) | 1176 | 28.4 (1.3) | 1345 | 29.9 (1.2) | <0.001 | 6.4  |
|  | Region          |      |            |      |            |      |            |      |            |      |            |      |            |        |      |
|  | Urban           | 1269 | 24.0 (1.2) | 1553 | 26.8 (1.1) | 1670 | 28.0 (1.1) | 1664 | 26.7 (1.1) | 1598 | 24.7 (1.1) | 1652 | 22.8 (1.0) | 0.316  | -1.2 |
|  | Rural           | 2813 | 17.6 (0.7) | 2753 | 19.3 (0.8) | 3220 | 22.9 (0.7) | 3056 | 24.1 (0.8) | 3081 | 25.3 (0.8) | 3293 | 26.3 (0.8) | <0.001 | 8.7  |
|  | General obesity |      |            |      |            |      |            |      |            |      |            |      |            |        |      |
|  | Total           | 7760 | 2.9 (0.2)  | 8354 | 4.7 (0.2)  | 9333 | 6.3 (0.3)  | 8983 | 7.0 (0.3)  | 8826 | 7.3 (0.3)  | 9365 | 8.7 (0.3)  | <0.001 | 5.8  |
|  | Men             |      |            |      |            |      |            |      |            |      |            |      |            |        |      |
|  | Overall         | 3678 | 2.0 (0.2)  | 4048 | 4.2 (0.3)  | 4443 | 5.8 (0.4)  | 4263 | 6.4 (0.4)  | 4147 | 7.3 (0.4)  | 4420 | 8.7 (0.4)  | <0.001 | 6.7  |
|  | Age (years)     |      |            |      |            |      |            |      |            |      |            |      |            |        |      |
|  | 18-39           | 1823 | 1.0 (0.2)  | 1839 | 2.9 (0.4)  | 1844 | 5.1 (0.5)  | 1391 | 5.6 (0.6)  | 1197 | 7.3 (0.8)  | 1177 | 8.8 (0.8)  | <0.001 | 7.8  |
|  | 40-59           | 1269 | 3.1 (0.5)  | 1506 | 5.0 (0.6)  | 1776 | 6.3 (0.6)  | 1911 | 7.5 (0.6)  | 1931 | 7.7 (0.6)  | 2049 | 9.8 (0.7)  | <0.001 | 6.7  |
|  | ≥60             | 586  | 3.4 (0.8)  | 703  | 7.8 (1.0)  | 823  | 7.4 (0.9)  | 961  | 7.1 (0.8)  | 1019 | 6.4 (0.8)  | 1194 | 6.3 (0.7)  | 0.024  | 2.9  |
|  | Region          |      |            |      |            |      |            |      |            |      |            |      |            |        |      |
|  | Urban           | 1152 | 2.5 (0.5)  | 1421 | 5.9 (0.7)  | 1506 | 7.4 (0.7)  | 1489 | 7.0 (0.7)  | 1408 | 7.5 (0.7)  | 1450 | 10.1 (0.8) | <0.001 | 7.6  |
|  | Rural           | 2526 | 1.8 (0.3)  | 2627 | 3.3 (0.4)  | 2937 | 4.9 (0.4)  | 2774 | 6.0 (0.5)  | 2739 | 7.1 (0.5)  | 2970 | 8.0 (0.5)  | <0.001 | 6.2  |
|  | Women           |      |            |      |            |      |            |      |            |      |            |      |            |        |      |
|  | Overall         | 4082 | 3.8 (0.3)  | 4306 | 5.2 (0.4)  | 4890 | 6.7 (0.4)  | 4720 | 7.6 (0.4)  | 4679 | 7.3 (0.4)  | 4945 | 8.6 (0.4)  | <0.001 | 4.8  |
|  | Age (years)     |      |            |      |            |      |            |      |            |      |            |      |            |        |      |
|  | 18-39           | 2063 | 1.6 (0.3)  | 1881 | 3.4 (0.4)  | 1973 | 4.2 (0.5)  | 1501 | 4.9 (0.6)  | 1324 | 4.1 (0.5)  | 1289 | 5.9 (0.7)  | <0.001 | 4.3  |
|  | 40-59           | 1390 | 6.0 (0.6)  | 1634 | 6.4 (0.6)  | 1967 | 9.3 (0.7)  | 2147 | 10.1 (0.7) | 2179 | 10.5 (0.7) | 2311 | 11.9 (0.7) | <0.001 | 5.9  |
|  | ≥60             | 629  | 7.2 (1.0)  | 791  | 9.1 (1.0)  | 950  | 10.2 (1.0) | 1072 | 12.5 (1.0) | 1176 | 12.5 (1.0) | 1345 | 11.9 (0.9) | <0.001 | 4.7  |
|  | Region          |      |            |      |            |      |            |      |            |      |            |      |            |        |      |
|  | Urban           | 1269 | 3.8 (0.6)  | 1553 | 6.1 (0.6)  | 1670 | 6.7 (0.7)  | 1664 | 8.1 (0.7)  | 1598 | 7.6 (0.8)  | 1652 | 8.9 (0.8)  | <0.001 | 5.1  |

|                   |      |            |      |            |      |            |      |            |      |            |      |            |        |      |
|-------------------|------|------------|------|------------|------|------------|------|------------|------|------------|------|------------|--------|------|
| Rural             | 2813 | 3.8 (0.4)  | 2753 | 4.6 (0.4)  | 3220 | 6.5 (0.5)  | 3056 | 7.2 (0.5)  | 3081 | 7.0 (0.5)  | 3293 | 8.4 (0.5)  | <0.001 | 4.6  |
| Abdominal obesity |      |            |      |            |      |            |      |            |      |            |      |            |        |      |
| Total             | 7760 | 22.8 (0.5) | 8354 | 27.9 (0.5) | 9333 | 35.0 (0.5) | 8983 | 39.0 (0.5) | 8826 | 40.3 (0.5) | 9365 | 45.3 (0.5) | <0.001 | 22.5 |
| Men               |      |            |      |            |      |            |      |            |      |            |      |            |        |      |
| Overall           | 3678 | 17.2 (0.6) | 4048 | 24.8 (0.7) | 4443 | 32.5 (0.7) | 4263 | 37.5 (0.7) | 4147 | 39.1 (0.8) | 4420 | 44.7 (0.7) | <0.001 | 27.5 |
| Age (years)       |      |            |      |            |      |            |      |            |      |            |      |            |        |      |
| 18-39             | 1823 | 12.6 (0.8) | 1839 | 19.2 (0.9) | 1844 | 27.5 (1.0) | 1391 | 32.6 (1.3) | 1197 | 35.0 (1.4) | 1177 | 39.4 (1.4) | <0.001 | 26.8 |
| 40-59             | 1269 | 20.8 (1.1) | 1506 | 29.3 (1.2) | 1776 | 37.3 (1.1) | 1911 | 43.9 (1.1) | 1931 | 44.8 (1.1) | 2049 | 51.7 (1.1) | <0.001 | 30.9 |
| ≥60               | 586  | 27.6 (1.8) | 703  | 36.8 (1.8) | 823  | 41.7 (1.7) | 961  | 42.2 (1.6) | 1019 | 42.8 (1.5) | 1194 | 49.6 (1.4) | <0.001 | 22.0 |
| Region            |      |            |      |            |      |            |      |            |      |            |      |            |        |      |
| Urban             | 1152 | 24.7 (1.3) | 1421 | 30.0 (1.2) | 1506 | 37.2 (1.2) | 1489 | 41.3 (1.3) | 1408 | 40.9 (1.3) | 1450 | 46.5 (1.3) | <0.001 | 21.8 |
| Rural             | 2526 | 13.7 (0.7) | 2627 | 21.9 (0.8) | 2937 | 29.9 (0.8) | 2774 | 35.2 (0.9) | 2739 | 37.9 (0.9) | 2970 | 43.7 (0.9) | <0.001 | 30.0 |
| Women             |      |            |      |            |      |            |      |            |      |            |      |            |        |      |
| Overall           | 4082 | 27.8 (0.7) | 4306 | 30.8 (0.7) | 4890 | 37.1 (0.7) | 4720 | 40.3 (0.7) | 4679 | 41.4 (0.7) | 4945 | 45.9 (0.7) | <0.001 | 18.1 |
| Age (years)       |      |            |      |            |      |            |      |            |      |            |      |            |        |      |
| 18-39             | 2063 | 16.5 (0.8) | 1881 | 20.3 (0.9) | 1973 | 24.3 (1.0) | 1501 | 27.4 (1.2) | 1324 | 28.9 (1.2) | 1289 | 33.3 (1.3) | <0.001 | 16.8 |
| 40-59             | 1390 | 38.6 (1.3) | 1634 | 41.2 (1.2) | 1967 | 50.7 (1.1) | 2147 | 54.0 (1.1) | 2179 | 54.4 (1.1) | 2311 | 58.6 (1.0) | <0.001 | 20.0 |
| ≥60               | 629  | 47.4 (2.0) | 791  | 47.7 (1.8) | 950  | 56.2 (1.6) | 1072 | 59.1 (1.5) | 1176 | 60.7 (1.4) | 1345 | 66.3 (1.3) | <0.001 | 18.9 |
| Region            |      |            |      |            |      |            |      |            |      |            |      |            |        |      |
| Urban             | 1269 | 32.9 (1.3) | 1553 | 33.6 (1.2) | 1670 | 36.9 (1.2) | 1664 | 39.9 (1.2) | 1598 | 41.5 (1.2) | 1652 | 42.9 (1.2) | <0.001 | 10.0 |
| Rural             | 2813 | 25.1 (0.8) | 2753 | 28.7 (0.9) | 3220 | 36.6 (0.8) | 3056 | 40.0 (0.9) | 3081 | 41.1 (0.9) | 3293 | 47.1 (0.9) | <0.001 | 22.0 |

<sup>a</sup> Linear trends in the prevalence of overweight, general obesity and abdominal obesity were tested using logistic regression model adjusted for sex, age and region.

<sup>b</sup> 2009-1993

Overweight and general obesity were defined as a BMI from 24 kg/m<sup>2</sup> to 27.99 kg/m<sup>2</sup> and a BMI ≥28 kg/m<sup>2</sup>, respectively. Abdominal obesity was defined as a WC≥85cm for men and ≥80cm for women.



Supplementary Table 2. Trends in prevalence of overweight, general obesity and abdominal obesity among Chinese Adults: the CHNS 1993-2009 (using WHO criteria for Europids)

|             | 1993     |            | 1997     |            | 2000     |            | 2004     |            | 2006     |            | 2009     |            | <i>p</i> for trend <sup>a</sup> | $\Delta$ <sup>b</sup> |
|-------------|----------|------------|----------|------------|----------|------------|----------|------------|----------|------------|----------|------------|---------------------------------|-----------------------|
|             | <i>n</i> | % (SE)     |                                 |                       |
| Overweight  |          |            |          |            |          |            |          |            |          |            |          |            |                                 |                       |
| Total       | 7760     | 12.5 (0.4) | 8354     | 15.8 (0.4) | 9333     | 19.4 (0.4) | 8983     | 20.6 (0.4) | 8826     | 21.5 (0.4) | 9365     | 22.7 (0.4) | <0.001                          | 10.2                  |
| Men         |          |            |          |            |          |            |          |            |          |            |          |            |                                 |                       |
| Overall     | 3678     | 10.3 (0.5) | 4048     | 14.8 (0.6) | 4443     | 18.9 (0.6) | 4263     | 20.8 (0.6) | 4147     | 22.8 (0.7) | 4420     | 24.8 (0.6) | <0.001                          | 14.5                  |
| Age (years) |          |            |          |            |          |            |          |            |          |            |          |            |                                 |                       |
| 18-39       | 1823     | 7.8 (0.6)  | 1839     | 11.9 (0.8) | 1844     | 16.6 (0.9) | 1391     | 17.4 (1.0) | 1197     | 20.6 (1.2) | 1177     | 23.0 (1.2) | <0.001                          | 15.2                  |
| 40-59       | 1269     | 13.6 (1.0) | 1506     | 17.7 (1.0) | 1776     | 22.4 (1.0) | 1911     | 25.3 (1.0) | 1931     | 26.8 (1.0) | 2049     | 28.5 (1.0) | <0.001                          | 14.9                  |
| ≥60         | 586      | 12.8 (1.4) | 703      | 19.7 (1.5) | 823      | 20.4 (1.4) | 961      | 24.0 (1.4) | 1019     | 22.6 (1.3) | 1194     | 23.4 (1.2) | <0.001                          | 10.6                  |
| Region      |          |            |          |            |          |            |          |            |          |            |          |            |                                 |                       |
| Urban       | 1152     | 14.4 (1.0) | 1421     | 19.1 (1.0) | 1506     | 22.3 (1.1) | 1489     | 22.4 (1.1) | 1408     | 22.6 (1.1) | 1450     | 25.0 (1.1) | <0.001                          | 10.6                  |
| Rural       | 2526     | 8.4 (0.6)  | 2627     | 12.4 (0.6) | 2937     | 17.0 (0.7) | 2774     | 19.6 (0.8) | 2739     | 22.5 (0.8) | 2970     | 24.6 (0.8) | <0.001                          | 16.2                  |
| Women       |          |            |          |            |          |            |          |            |          |            |          |            |                                 |                       |
| Overall     | 4082     | 14.5 (0.6) | 4306     | 16.7 (0.6) | 4890     | 19.8 (0.6) | 4720     | 20.4 (0.6) | 4679     | 20.3 (0.6) | 4945     | 20.9 (0.6) | <0.001                          | 6.4                   |
| Age (years) |          |            |          |            |          |            |          |            |          |            |          |            |                                 |                       |
| 18-39       | 2063     | 9.9 (0.7)  | 1881     | 12.8 (0.8) | 1973     | 15.0 (0.8) | 1501     | 15.0 (0.9) | 1324     | 14.5 (1.0) | 1289     | 14.5 (1.0) | <0.001                          | 4.6                   |
| 40-59       | 1390     | 20.7 (1.1) | 1634     | 22.6 (1.0) | 1967     | 27.9 (1.0) | 2147     | 28.7 (1.0) | 2179     | 28.6 (1.0) | 2311     | 29.6 (1.0) | <0.001                          | 8.9                   |
| ≥60         | 629      | 18.9 (1.6) | 791      | 19.0 (1.4) | 950      | 21.2 (1.3) | 1072     | 23.3 (1.3) | 1176     | 24.6 (1.3) | 1345     | 26.3 (1.2) | <0.001                          | 7.4                   |
| Region      |          |            |          |            |          |            |          |            |          |            |          |            |                                 |                       |

|                   |      |            |      |            |      |            |      |            |      |            |      |            |        |     |
|-------------------|------|------------|------|------------|------|------------|------|------------|------|------------|------|------------|--------|-----|
| Urban             | 1269 | 17.2 (1.1) | 1553 | 19.0 (1.0) | 1670 | 22.5 (1.0) | 1664 | 22.1 (1.0) | 1598 | 19.2 (1.0) | 1652 | 19.7 (1.0) | 0.002  | 2.5 |
| Rural             | 2813 | 13.1 (0.6) | 2753 | 15.2 (0.7) | 3220 | 18.3 (0.7) | 3056 | 19.4 (0.7) | 3081 | 20.6 (0.7) | 3293 | 21.3 (0.7) | <0.001 | 8.2 |
| General obesity   |      |            |      |            |      |            |      |            |      |            |      |            |        |     |
| Total             | 7760 | 0.9 (0.1)  | 8354 | 1.6 (0.1)  | 9333 | 2.4 (0.2)  | 8983 | 3.0 (0.2)  | 8826 | 3.2 (0.2)  | 9365 | 3.7 (0.2)  | <0.001 | 2.8 |
| Men               |      |            |      |            |      |            |      |            |      |            |      |            |        |     |
| Overall           | 3678 | 0.6 (0.1)  | 4048 | 1.1 (0.2)  | 4443 | 2.0 (0.2)  | 4263 | 2.3 (0.2)  | 4147 | 3.1 (0.3)  | 4420 | 3.6 (0.3)  | <0.001 | 3.0 |
| Age (years)       |      |            |      |            |      |            |      |            |      |            |      |            |        |     |
| 18-39             | 1823 | 0.4 (0.1)  | 1839 | 0.6 (0.2)  | 1844 | 1.9 (0.3)  | 1391 | 2.3 (0.4)  | 1197 | 3.4 (0.5)  | 1177 | 3.5 (0.5)  | <0.001 | 3.0 |
| 40-59             | 1269 | 0.6 (0.2)  | 1506 | 1.4 (0.3)  | 1776 | 2.0 (0.3)  | 1911 | 2.5 (0.4)  | 1931 | 2.8 (0.4)  | 2049 | 4.1 (0.4)  | <0.001 | 3.5 |
| ≥60               | 586  | 1.4 (0.5)  | 703  | 2.7 (0.6)  | 823  | 2.6 (0.5)  | 961  | 2.2 (0.5)  | 1019 | 2.8 (0.5)  | 1194 | 3.5 (0.5)  | 0.005  | 2.1 |
| Region            |      |            |      |            |      |            |      |            |      |            |      |            |        |     |
| Urban             | 1152 | 0.5 (0.2)  | 1421 | 1.7 (0.4)  | 1506 | 2.5 (0.4)  | 1489 | 2.9 (0.5)  | 1408 | 3.3 (0.5)  | 1450 | 4.5 (0.6)  | <0.001 | 4.0 |
| Rural             | 2526 | 0.6 (0.2)  | 2627 | 0.9 (0.2)  | 2937 | 1.8 (0.2)  | 2774 | 2.0 (0.3)  | 2739 | 3.0 (0.3)  | 2970 | 3.1 (0.3)  | <0.001 | 2.5 |
| Women             |      |            |      |            |      |            |      |            |      |            |      |            |        |     |
| Overall           | 4082 | 1.2 (0.2)  | 4306 | 2.1 (0.2)  | 4890 | 2.6 (0.2)  | 4720 | 3.5 (0.3)  | 4679 | 3.2 (0.3)  | 4945 | 3.7 (0.3)  | <0.001 | 2.5 |
| Age (years)       |      |            |      |            |      |            |      |            |      |            |      |            |        |     |
| 18-39             | 2063 | 0.3 (0.1)  | 1881 | 1.3 (0.3)  | 1973 | 1.5 (0.3)  | 1501 | 2.4 (0.4)  | 1324 | 2.0 (0.4)  | 1289 | 2.7 (0.5)  | <0.001 | 2.4 |
| 40-59             | 1390 | 2.2 (0.4)  | 1634 | 2.3 (0.4)  | 1967 | 3.5 (0.4)  | 2147 | 4.2 (0.4)  | 2179 | 4.1 (0.4)  | 2311 | 4.4 (0.4)  | <0.001 | 2.2 |
| ≥60               | 629  | 2.4 (0.6)  | 791  | 4.7 (0.8)  | 950  | 4.9 (0.7)  | 1072 | 6.3 (0.7)  | 1176 | 5.4 (0.7)  | 1345 | 5.8 (0.6)  | <0.001 | 3.4 |
| Region            |      |            |      |            |      |            |      |            |      |            |      |            |        |     |
| Urban             | 1269 | 1.1 (0.3)  | 1553 | 2.6 (0.4)  | 1670 | 2.4 (0.4)  | 1664 | 3.6 (0.5)  | 1598 | 3.3 (0.5)  | 1652 | 3.5 (0.5)  | <0.001 | 2.4 |
| Rural             | 2813 | 1.2 (0.2)  | 2753 | 1.8 (0.3)  | 3220 | 2.7 (0.3)  | 3056 | 3.4 (0.3)  | 3081 | 3.1 (0.3)  | 3293 | 3.8 (0.4)  | <0.001 | 2.6 |
| Abdominal obesity |      |            |      |            |      |            |      |            |      |            |      |            |        |     |
| Total             | 7760 | 5.5 (0.3)  | 8354 | 6.9 (0.3)  | 9333 | 9.1 (0.3)  | 8983 | 9.8 (0.3)  | 8826 | 10.1 (0.4) | 9365 | 13.0 (0.4) | <0.001 | 7.5 |

|             |      |            |      |            |      |            |      |            |      |            |      |            |        |      |
|-------------|------|------------|------|------------|------|------------|------|------------|------|------------|------|------------|--------|------|
| Men         |      |            |      |            |      |            |      |            |      |            |      |            |        |      |
| Overall     | 3678 | 0.8 (0.1)  | 4048 | 1.7 (0.2)  | 4443 | 2.7 (0.3)  | 4263 | 2.7 (0.3)  | 4147 | 3.1 (0.3)  | 4420 | 4.5 (0.3)  | <0.001 | 3.7  |
| Age (years) |      |            |      |            |      |            |      |            |      |            |      |            |        |      |
| 18-39       | 1823 | 0.5 (0.2)  | 1839 | 0.9 (0.2)  | 1844 | 2.3 (0.3)  | 1391 | 2.3 (0.4)  | 1197 | 2.9 (0.5)  | 1177 | 3.9 (0.6)  | <0.001 | 3.4  |
| 40-59       | 1269 | 0.5 (0.2)  | 1506 | 1.6 (0.3)  | 1776 | 2.6 (0.4)  | 1911 | 2.8 (0.4)  | 1931 | 2.9 (0.4)  | 2049 | 5.2 (0.5)  | <0.001 | 4.7  |
| ≥60         | 586  | 2.6 (0.7)  | 703  | 4.8 (0.8)  | 823  | 4.7 (0.7)  | 961  | 3.9 (0.6)  | 1019 | 4.3 (0.6)  | 1194 | 5.2 (0.6)  | 0.070  | 2.6  |
| Region      |      |            |      |            |      |            |      |            |      |            |      |            |        |      |
| Urban       | 1152 | 1.1 (0.3)  | 1421 | 2.1 (0.4)  | 1506 | 3.6 (0.5)  | 1489 | 3.5 (0.5)  | 1408 | 3.9 (0.5)  | 1450 | 4.9 (0.6)  | <0.001 | 3.8  |
| Rural       | 2526 | 0.6 (0.2)  | 2627 | 1.4 (0.2)  | 2937 | 2.2 (0.3)  | 2774 | 2.2 (0.3)  | 2739 | 2.7 (0.3)  | 2970 | 4.2 (0.4)  | <0.001 | 3.6  |
| Women       |      |            |      |            |      |            |      |            |      |            |      |            |        |      |
| Overall     | 4082 | 9.9 (0.5)  | 4306 | 11.9 (0.5) | 4890 | 14.9 (0.5) | 4720 | 16.2 (0.6) | 4679 | 16.4 (0.6) | 4945 | 20.7 (0.6) | <0.001 | 10.8 |
| Age (years) |      |            |      |            |      |            |      |            |      |            |      |            |        |      |
| 18-39       | 2063 | 4.6 (0.5)  | 1881 | 6.8 (0.6)  | 1973 | 7.3 (0.6)  | 1501 | 8.7 (0.7)  | 1324 | 8.8 (0.8)  | 1289 | 13.0 (0.9) | <0.001 | 8.4  |
| 40-59       | 1390 | 13.3 (0.9) | 1634 | 15.1 (0.9) | 1967 | 20.8 (0.9) | 2147 | 22.4 (0.9) | 2179 | 22.5 (0.9) | 2311 | 27.2 (0.9) | <0.001 | 13.9 |
| ≥60         | 629  | 22.3 (1.7) | 791  | 23.8 (1.5) | 950  | 30.2 (1.5) | 1072 | 31.2 (1.4) | 1176 | 31.7 (1.4) | 1345 | 35.7 (1.3) | <0.001 | 13.4 |
| Region      |      |            |      |            |      |            |      |            |      |            |      |            |        |      |
| Urban       | 1269 | 13.1 (1.0) | 1553 | 13.1 (0.9) | 1670 | 15.0 (1.0) | 1664 | 16.2 (1.0) | 1598 | 16.7 (1.0) | 1652 | 18.5 (1.1) | <0.001 | 6.4  |
| Rural       | 2813 | 8.1 (0.5)  | 2753 | 10.9 (0.6) | 3220 | 14.6 (0.7) | 3056 | 15.9 (0.7) | 3081 | 16.0 (0.7) | 3293 | 21.7 (0.8) | <0.001 | 13.6 |

<sup>a</sup> Linear trends in the prevalence of overweight, general obesity and abdominal obesity were tested using logistic regression model adjusted for sex, age and region.

<sup>b</sup> 2009-1993

Overweight and general obesity were defined as a BMI from 25kg/m<sup>2</sup> to 29.99 kg/m<sup>2</sup> and a BMI≥30 kg/m<sup>2</sup>, respectively. Abdominal obesity was defined as a WC≥102cm for men and ≥88cm for women.
